# Supplementary material for: Bright-yellow to orange-red thermochromic luminescence of an AgI6–ZnII2 heterometallic aggregate
Source: Royal Society of Chemistry journal article supplement (doi:10.1039/c2dt32375c), 2012-12-10

**Electronic Supplementary Information (ESI) for *Dalton  
Transactions***

**Bright-yellow to orange-red thermochromic luminescence of  
a  $\text{Ag}^{\text{I}}_6\text{-Zn}^{\text{II}}_2$  heterometallic aggregate**

**Di Sun\* Liangliang Zhang, Haifeng Lu, Shengyu Feng and Daofeng Sun**

*Key Lab of Colloid and Interface Chemistry, Ministry of Education, School of Chemistry and Chemical*

*Engineering, Shandong University, Jinan, Shandong, 250100, China.*

*Corresponding Author: E-mail: dsun@sdu.edu.cn; Fax: +86-531-88364218.*

***Content***

|                                                                                     |    |
|-------------------------------------------------------------------------------------|----|
| (1) Table S1 Selected bond lengths (Å) and angles (°) for 1 .....                   | 2  |
| (2) Table S2 Selected hydrogen bond parameters (Å, °) for 1 .....                   | 3  |
| (3) Table S3 Photoluminescence emission data for $\text{L}_{\text{Ag}}$ and 1. .... | 4  |
| (4) Figure S1 XRD spectrum of 1.....                                                | 5  |
| (5) Figure S2 IR spectrum of 1.....                                                 | 6  |
| (6) Figure S3 The TG curve of 1.....                                                | 7  |
| (7) Figure S4: Energy dispersive X-ray spectroscopy (EDS) data for 1 .....          | 8  |
| (8) Figure S5: UV-Vis spectrum of 1.....                                            | 9  |
| (9) Figure S6: Photoluminescence of free ligand $\text{H}_2\text{mna}$ .....        | 10 |

(1) Table S1 Selected bond lengths (Å) and angles (°) for 1

|                           |            |                           |            |
|---------------------------|------------|---------------------------|------------|
| Ag1—N3                    | 2.287(7)   | Ag3—N1                    | 2.325(8)   |
| Ag1—S2                    | 2.485(2)   | Ag3—S2 <sup>i</sup>       | 2.472(2)   |
| Ag1—S1                    | 2.501(2)   | Ag3—S3                    | 2.485(2)   |
| Ag1—Ag2                   | 2.9338(10) | Ag3—Ag2 <sup>i</sup>      | 2.9308(10) |
| Ag1—Ag3                   | 3.0376(11) | Zn1—O6                    | 1.997(6)   |
| Ag2—N2                    | 2.279(7)   | Zn1—O1W                   | 2.069(9)   |
| Ag2—S3                    | 2.489(2)   | Zn1—N5                    | 2.087(7)   |
| Ag2—S1 <sup>i</sup>       | 2.490(3)   | Zn1—O2W                   | 2.156(7)   |
| Ag2—Ag3 <sup>i</sup>      | 2.9308(10) | Zn1—N4                    | 2.164(9)   |
| N3—Ag1—S2                 | 127.9(2)   | Ag2 <sup>i</sup> —Ag3—Ag1 | 76.94(3)   |
| N3—Ag1—S1                 | 114.8(2)   | O6—Zn1—O1W                | 109.2(3)   |
| S2—Ag1—S1                 | 113.65(8)  | O6—Zn1—N5                 | 131.5(3)   |
| Ag2—Ag1—Ag3               | 73.04(3)   | O1W—Zn1—N5                | 119.1(4)   |
| N2—Ag2—S3                 | 122.1(2)   | O6—Zn1—O2W                | 98.0(3)    |
| N2—Ag2—S1 <sup>i</sup>    | 123.6(2)   | O1W—Zn1—O2W               | 86.8(3)    |
| S3—Ag2—S1 <sup>i</sup>    | 108.85(8)  | N5—Zn1—O2W                | 88.4(3)    |
| Ag3 <sup>i</sup> —Ag2—Ag1 | 72.35(3)   | O6—Zn1—N4                 | 94.9(3)    |
| N1—Ag3—S2 <sup>i</sup>    | 121.4(2)   | O1W—Zn1—N4                | 95.0(3)    |
| N1—Ag3—S3                 | 115.3(2)   | N5—Zn1—N4                 | 78.3(3)    |
| S2 <sup>i</sup> —Ag3—S3   | 116.02(8)  | O2W—Zn1—N4                | 165.7(3)   |

Symmetry codes: (i)  $-x+1, -y+1, -z+1$ .

**(2) Table S2 Selected hydrogen bond parameters (Å, °) for 1**

| <i>D</i> —H... <i>A</i>      | <i>D</i> —H | H... <i>A</i> | <i>D</i> ... <i>A</i> | <i>D</i> —H... <i>A</i> |
|------------------------------|-------------|---------------|-----------------------|-------------------------|
| O7—H7C...O3                  | 0.84        | 1.91          | 2.681(13)             | 153                     |
| O2W—H2WB...O2 <sup>iii</sup> | 0.85        | 2.02          | 2.766(9)              | 146                     |
| O2W—H2WA...O4 <sup>iv</sup>  | 0.85        | 1.88          | 2.720(10)             | 169                     |
| O3W—H3WA...O1 <sup>ii</sup>  | 0.85        | 1.96          | 2.796(10)             | 165                     |
| O3W—H3WB...O1 <sup>i</sup>   | 0.85        | 1.97          | 2.796(10)             | 165                     |

Symmetry codes: (i)  $-x+1, -y+1, -z+1$ ; (ii)  $x, y, z-1$ ; (iii)  $-x, -y, -z+1$ ; (iv)  $x-1, y-1, z-1$ .

**(3) Table S3 Photoluminescence emission data for L<sub>Ag</sub> and 1.**

| Complex                   | $\lambda_{\text{ex}}/\text{nm}$ | $\lambda_{\text{em}}/\text{nm}$ | Possible transitions             |
|---------------------------|---------------------------------|---------------------------------|----------------------------------|
| H <sub>2</sub> mna (298K) | 300                             | 470                             | $\pi^* \rightarrow \pi$          |
| L <sub>Ag</sub> (298K)    | 365                             | 469, 551                        | $\pi^* \rightarrow \pi$ and LMCT |
| L <sub>Ag</sub> (255K)    | 365                             | 469, 555                        | $\pi^* \rightarrow \pi$ and LMCT |
| L <sub>Ag</sub> (173K)    | 365                             | 469, 559                        | $\pi^* \rightarrow \pi$ and LMCT |
| L <sub>Ag</sub> (130K)    | 365                             | 469, 561                        | $\pi^* \rightarrow \pi$ and LMCT |
| L <sub>Ag</sub> (77K)     | 365                             | 469, 571                        | $\pi^* \rightarrow \pi$ and LMCT |
| 1 (298K)                  | 365                             | 544                             | LMCT                             |
| 1 (255K)                  | 365                             | 551                             | LMCT                             |
| 1 (173K)                  | 365                             | 554                             | LMCT                             |
| 1 (130K)                  | 365                             | 558                             | LMCT                             |
| 1 (77K)                   | 365                             | 565                             | LMCT                             |

**(4) Figure S1 XRD spectrum of 1**

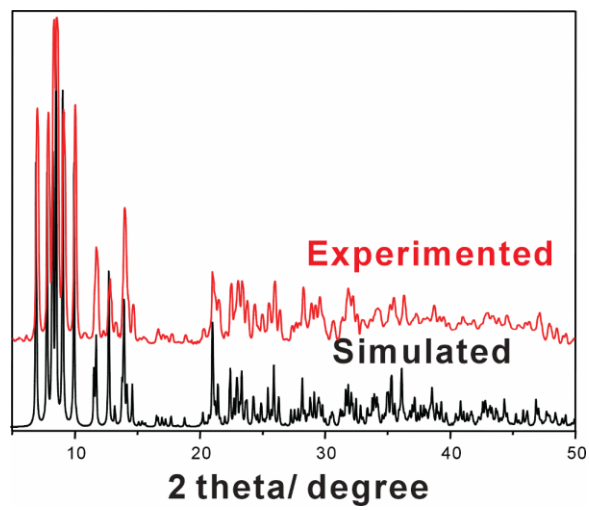

**(5) Figure S2 IR spectrum of 1**

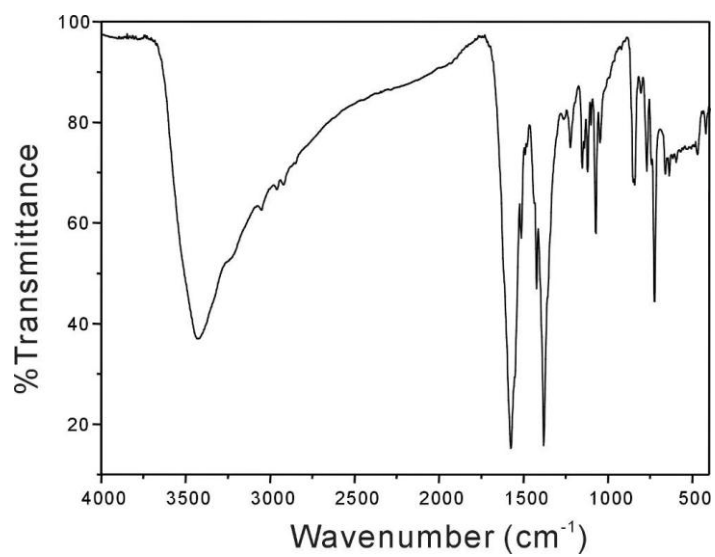

**(6) Figure S3 The TG curve of 1**

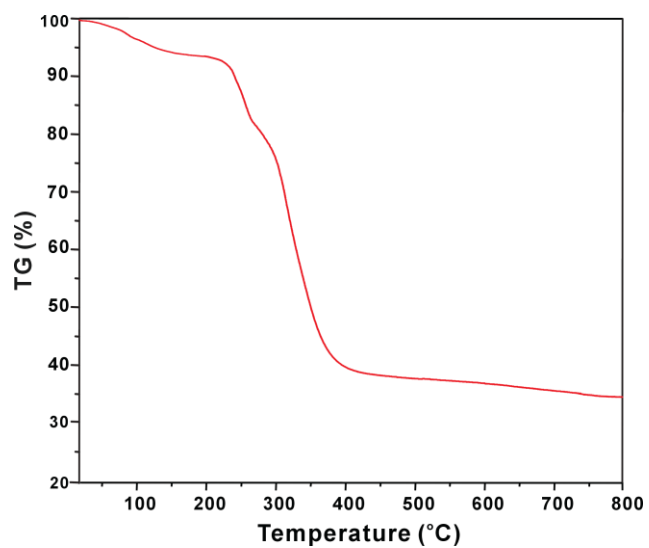

**(7) Figure S4: Energy dispersive X-ray spectroscopy (EDS) data for 1**

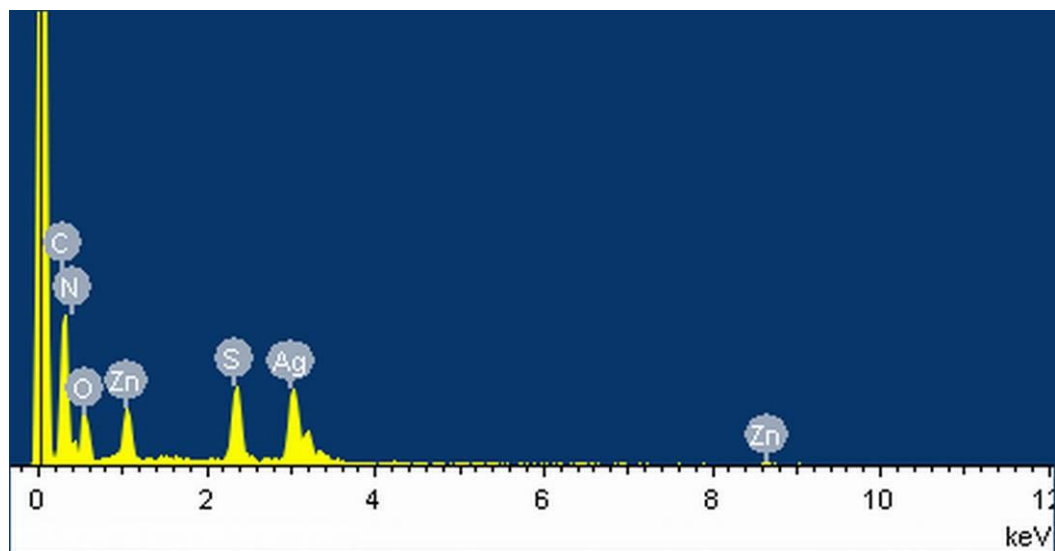



**(8) Figure S5: UV-Vis spectrum of 1**

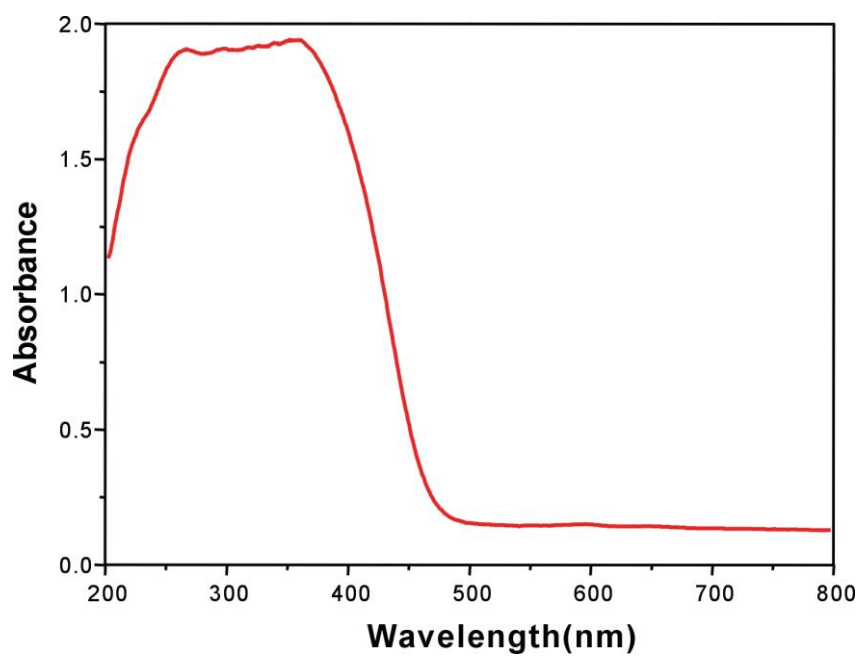

**(9) Figure S6: Photoluminescence of free ligand H<sub>2</sub>mna**

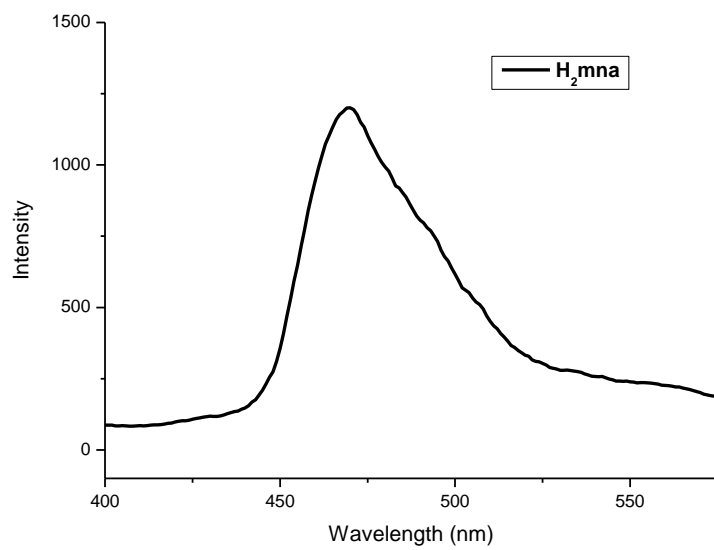

Supplement: c2dt32375c.pdf [file c2dt32375c.pdf]
